# Supplementary material for: QTL Mapping for Agronomic Important Traits in Well-Adapted Wheat Cultivars
Source: MDPI journal article supplement (doi:10.3390/agronomy14050940), 2024-04-30
Supplement: s1 [file s1]

Table S1. Comparison of QTL mapped in this study with reported genes/QTL in other studies

| QTL              | Environment | Chromosome | Physical position (Mb) | LOD   | PVE (%) | Add   | Positions of reported genes/QTL (Mb)<br>in other studies | References |
|------------------|-------------|------------|------------------------|-------|---------|-------|----------------------------------------------------------|------------|
| <i>QPh-1A</i>    | 2020TA      | 1A         | 516.58-535.77          | 4     | 4.31    | 1.5   | 509-511                                                  | 36         |
| <i>QPh-2D.1</i>  | 2020TA      | 2D         | 21.61-32.34            | 21.33 | 28.88   | 3.89  | 24                                                       | 35         |
|                  | 2021TA      | 2D         | 19.62-23.03            | 29.4  | 37.81   | 3.18  | 24                                                       | 35         |
|                  | 2021ZK      | 2D         | 21.61-32.34            | 11.34 | 21.32   | 2.94  | 24                                                       | 35         |
|                  | 2021TA      | 3B         | 31.64-39.75            | 2.54  | 2.24    | -0.77 | 43.4-43.9                                                | 36         |
| <i>QPh-3B.2</i>  | 2021TA      | 3B         | 31.64-39.75            | 2.54  | 2.24    | -0.77 | 43.4-43.9                                                | 36         |
| <i>QPh-4A</i>    | 2021TA      | 4A         | 616.67-617.58          | 6.2   | 5.54    | -1.21 | 605、626                                                  | 37、40      |
| <i>QPh-7D.1</i>  | 2021TA      | 7D         | 8.56-588.62            | 2.99  | 3.1     | -0.9  | 7.5-7.6                                                  | 36         |
| <i>QSl-2D</i>    | 2020TA      | 2D         | 21.61-32.34            | 25.44 | 38.24   | 0.67  | 24                                                       | 18、35      |
|                  | 2021TA      | 2D         | 21.61-32.34            | 24.01 | 33.25   | 0.48  | 24                                                       | 18、35      |
| <i>QSl-6D</i>    | 2021TA      | 6D         | 404.23-448.87          | 3.33  | 3.95    | 0.17  | 405                                                      | 18         |
| <i>QSns-2B</i>   | 2020TA      | 2B         | 749.22-756             | 3.32  | 5.96    | -0.23 | 710.11-717.87                                            | 41         |
| <i>QSns-2D.2</i> | 2020TA      | 2D         | 31.81-50.23            | 3.41  | 6.1     | -0.23 | 28.09-34.43                                              | 7          |
| <i>QGns-3B</i>   | 2021TA      | 3B         | 814.29-803.52          | 5.05  | 8.83    | -1.93 | 805-237                                                  | 37         |
| <i>QGns-4A</i>   | 2020TA      | 4A         | 672.73-666.06          | 3.16  | 4.65    | 1.76  | 699.5-703                                                | 36         |
|                  | 2021TA      | 4A         | 680.4-673.49           | 10.31 | 18.24   | 2.71  | 699.5-703                                                | 36         |
| <i>QSn-1B</i>    | 2021ZK      | 1B         | 637.82-640.06          | 2.64  | 6.68    | 0.69  | 537-543                                                  | 37         |
| <i>QSn-6A</i>    | 2020TA      | 6A         | 600.19-604.44          | 3.06  | 7.78    | 0.45  | 598.6-598.7                                              | 36         |
| <i>QTgw-2A</i>   | 2021TA      | 2A         | 603.5-621.19           | 4.44  | 6.5     | 1.26  | 558.8                                                    | 39         |
| <i>QTgw-4A</i>   | 2021TA      | 4A         | 635.29-639.18          | 10.44 | 16.21   | -1.98 | 632-662                                                  | 37         |
| <i>QTgw-4B</i>   | 2021TA      | 4B         | 429.3-496.28           | 5.93  | 8.43    | -1.45 | 513.97-516.66                                            | 38         |
|                  | 2020TA      | 4B         | 482.13-562.87          | 4.05  | 8.78    | -1.99 | 513.97-516.66                                            | 38         |
| <i>QTgw-7B</i>   | 2021TA      | 7B         | 708.55-716.7           | 3.27  | 5.91    | 1.2   | 683-694                                                  | 37         |
| <i>QGl-6D</i>    | 2021TA      | 6D         | 404.23-448.87          | 3.15  | 4.22    | -0.07 | 405                                                      | 18         |

Note: LOD, logarithm of odds; PVE, phenotypic variance explained; Add, additive effect; Positive additive effects indicate that the allele increasing its phenotypic value is from YN999, and negative additive effects indicate that the allele increasing its phenotypic value is from XN822. PH, plant height (cm); SNS, spikelet number per spike; SL, spike length (cm); GNS, grain number per spike; SN, spike number per plant; TGW, thousand grain weight (g); GL, grain length (mm); GW, grain width (mm); GL/GW, length/width of grain; Peri, perimeter of grain (mm); Sur, surface area of grains per plant (mm<sup>2</sup>); 2020TA, in Taian during the 2020-2021 growing season; 2021TA, in Taian during the 2021-2022 growing season; 2021ZK, in Zhoukou during the 2021-2022 growing season.
